# Supplementary material for: Triglyceride-glucose indices predict all-cause mortality after stroke in NHANES 1999–2018
Source: Front Aging Neurosci. 2025 May 30;17:1617419. doi: 10.3389/fnagi.2025.1617419 (PMC12162973; doi:10.3389/fnagi.2025.1617419)
Supplement: Supplementary file 1 [file Table_1.XLSX]

## Sheet: Sheet1
	Differences among groups were compared according to TyG-related indicators.
	Characteristics	TyG					TyG-BMI					TyG-WC					TyG-WHtR
		Q1	Q2	Q3	Q4	P value	Q1	Q2	Q3	Q4	P value	Q1	Q2	Q3	Q4	P value	Q1	Q2	Q3	Q4	P value
	Age (yrs), mean ± sd	63.76 (61.17 ,66.34)	62.86 (59.83 ,65.89)	65.50 (63.27 ,67.74)	64.12 (61.90 ,66.34)	0.5548	65.68 (63.12 ,68.24)	67.08 (64.33 ,69.83)	63.17 (60.17 ,66.16)	60.62 (58.70 ,62.53)	<0.001	63.05 (60.20 ,65.89)	65.65 (63.34 ,67.96)	66.85 (64.33 ,69.36)	61.33 (59.24 ,63.43)	0.0074	63.05 (60.20 ,65.89)	65.65 (63.34 ,67.96)	66.85 (64.33 ,69.36)	61.33 (59.24 ,63.43)	0.0074
	PIR, mean ± sd	2.51 (2.12 ,2.89)	2.46 (2.22 ,2.69)	2.18 (1.89 ,2.46)	2.45 (2.14 ,2.76)	0.3682	2.59 (2.26 ,2.92)	2.42 (2.09 ,2.75)	2.21 (1.97 ,2.45)	2.34 (2.06 ,2.61)	0.2278	2.58 (2.25 ,2.90)	2.47 (2.19 ,2.75)	2.12 (1.90 ,2.34)	2.36 (2.06 ,2.66)	0.0547	2.58 (2.25 ,2.90)	2.47 (2.19 ,2.75)	2.12 (1.90 ,2.34)	2.36 (2.06 ,2.66)	0.0547
	Drinking, mean ± sd	2.21 (1.97 ,2.46)	2.50 (2.05 ,2.94)	2.07 (1.95 ,2.20)	2.14 (1.97 ,2.30)	0.2438	2.22 (1.86 ,2.57)	2.21 (2.01 ,2.41)	2.24 (2.07 ,2.40)	2.26 (1.93 ,2.59)	0.9947	2.21 (1.85 ,2.57)	2.23 (2.03 ,2.43)	2.33 (1.99 ,2.67)	2.18 (1.99 ,2.37)	0.9009	2.21 (1.85 ,2.57)	2.23 (2.03 ,2.43)	2.33 (1.99 ,2.67)	2.18 (1.99 ,2.37)	0.9009
	LDL-cholesterol (mmol/L), mean ± sd	96.97 (91.18 ,102.75)	107.04 (99.40 ,114.68)	115.66 (109.55 ,121.78)	117.50 (109.65 ,125.35)	<0.001	101.95 (95.76 ,108.13)	109.83 (104.25 ,115.40)	114.01 (105.26 ,122.75)	112.36 (106.24 ,118.47)	0.0225	102.92 (96.78 ,109.06)	113.90 (106.19 ,121.61)	108.96 (101.75 ,116.16)	111.96 (105.21 ,118.70)	0.091	102.92 (96.78 ,109.06)	113.90 (106.19 ,121.61)	108.96 (101.75 ,116.16)	111.96 (105.21 ,118.70)	0.091
	Gender,N % (95% CI)					0.2038					0.5847					0.0012					0.0012
	Male	40.87 (32.02 ,50.35)	35.27 (27.08 ,44.44)	43.58 (35.31 ,52.22)	47.89 (38.89 ,57.04)		41.11 (30.87 ,52.19)	44.79 (36.15 ,53.75)	45.37 (35.99 ,55.08)	37.20 (28.81 ,46.45)		28.59 (20.29 ,38.63)	40.96 (32.09 ,50.46)	45.96 (36.71 ,55.50)	52.77 (44.07 ,61.29)		28.59 (20.29 ,38.63)	40.96 (32.09 ,50.46)	45.96 (36.71 ,55.50)	52.77 (44.07 ,61.29)
	Female	59.13 (49.65 ,67.98)	64.73 (55.56 ,72.92)	56.42 (47.78 ,64.69)	52.11 (42.96 ,61.11)		58.89 (47.81 ,69.13)	55.21 (46.25 ,63.85)	54.63 (44.92 ,64.01)	62.80 (53.55 ,71.19)		71.41 (61.37 ,79.71)	59.04 (49.54 ,67.91)	54.04 (44.50 ,63.29)	47.23 (38.71 ,55.93)		71.41 (61.37 ,79.71)	59.04 (49.54 ,67.91)	54.04 (44.50 ,63.29)	47.23 (38.71 ,55.93)
	Race,N % (95% CI)					0.1729					0.0148					0.3391					0.3391
	Mexican American	3.39 (1.80 ,6.29)	3.11 (1.58 ,6.03)	4.40 (2.35 ,8.09)	6.39 (3.65 ,10.93)		2.94 (1.50 ,5.70)	3.64 (2.34 ,5.61)	6.09 (3.88 ,9.44)	4.79 (2.71 ,8.33)		3.16 (1.65 ,5.97)	3.98 (2.45 ,6.42)	7.04 (4.48 ,10.90)	3.58 (1.82 ,6.93)		3.16 (1.65 ,5.97)	3.98 (2.45 ,6.42)	7.04 (4.48 ,10.90)	3.58 (1.82 ,6.93)
	Other Hispanic	2.58 (1.15 ,5.67)	2.75 (1.06 ,6.93)	3.17 (1.06 ,9.11)	4.23 (2.01 ,8.67)		1.80 (0.59 ,5.39)	3.89 (1.88 ,7.86)	4.37 (2.20 ,8.51)	2.95 (1.27 ,6.68)		2.31 (0.82 ,6.38)	3.62 (1.75 ,7.36)	4.03 (2.07 ,7.72)	2.95 (1.17 ,7.26)		2.31 (0.82 ,6.38)	3.62 (1.75 ,7.36)	4.03 (2.07 ,7.72)	2.95 (1.17 ,7.26)
	Non-Hispanic White	63.85 (54.90 ,71.94)	71.87 (64.71 ,78.06)	73.12 (64.46 ,80.32)	71.68 (62.31 ,79.48)		71.38 (63.10 ,78.43)	74.71 (66.76 ,81.29)	64.31 (54.42 ,73.12)	69.89 (62.17 ,76.62)		69.90 (61.17 ,77.39)	72.97 (65.88 ,79.06)	67.21 (58.99 ,74.50)	70.30 (60.84 ,78.29)		69.90 (61.17 ,77.39)	72.97 (65.88 ,79.06)	67.21 (58.99 ,74.50)	70.30 (60.84 ,78.29)
	Non-Hispanic Black	23.01 (17.23 ,30.04)	12.25 (8.98 ,16.50)	13.14 (9.33 ,18.19)	9.79 (6.27 ,14.96)		9.96 (6.98 ,14.01)	14.33 (9.88 ,20.32)	19.62 (13.90 ,26.96)	14.85 (11.02 ,19.72)		13.15 (9.29 ,18.30)	13.97 (9.87 ,19.41)	17.26 (12.38 ,23.55)	14.06 (9.99 ,19.42)		13.15 (9.29 ,18.30)	13.97 (9.87 ,19.41)	17.26 (12.38 ,23.55)	14.06 (9.99 ,19.42)
	Others	7.16 (3.40 ,14.46)	10.01 (5.58 ,17.33)	6.16 (2.46 ,14.62)	7.92 (3.13 ,18.65)		13.92 (8.53 ,21.91)	3.44 (1.42 ,8.10)	5.60 (1.82 ,16.00)	7.52 (3.35 ,16.02)		11.48 (6.41 ,19.70)	5.45 (2.61 ,11.05)	4.45 (1.99 ,9.64)	9.11 (4.04 ,19.28)		11.48 (6.41 ,19.70)	5.45 (2.61 ,11.05)	4.45 (1.99 ,9.64)	9.11 (4.04 ,19.28)
	Education,N % (95% CI)					0.2731					0.1414					0.0239					0.0239
	≤ High school	55.18 (44.55 ,65.36)	55.26 (46.32 ,63.88)	58.42 (48.88 ,67.37)	65.22 (54.10 ,74.90)		53.60 (44.07 ,62.87)	56.80 (47.95 ,65.23)	65.59 (54.39 ,75.29)	58.99 (48.55 ,68.67)		52.35 (42.34 ,62.18)	58.97 (49.15 ,68.11)	67.52 (59.83 ,74.37)	56.97 (45.96 ,67.32)		52.35 (42.34 ,62.18)	58.97 (49.15 ,68.11)	67.52 (59.83 ,74.37)	56.97 (45.96 ,67.32)
	College	21.42 (14.79 ,29.99)	28.49 (21.82 ,36.24)	27.01 (19.93 ,35.51)	24.52 (16.26 ,35.21)		21.32 (14.38 ,30.43)	30.10 (22.39 ,39.12)	22.95 (15.75 ,32.18)	27.34 (18.98 ,37.67)		22.17 (16.13 ,29.67)	28.83 (21.41 ,37.60)	24.58 (18.11 ,32.45)	26.20 (17.55 ,37.19)		22.17 (16.13 ,29.67)	28.83 (21.41 ,37.60)	24.58 (18.11 ,32.45)	26.20 (17.55 ,37.19)
	> College	23.39 (14.85 ,34.84)	16.25 (9.93 ,25.45)	14.57 (8.51 ,23.82)	10.26 (4.92 ,20.18)		25.08 (16.38 ,36.39)	13.10 (7.51 ,21.86)	11.46 (5.56 ,22.16)	13.67 (7.64 ,23.27)		25.48 (17.12 ,36.14)	12.20 (7.30 ,19.68)	7.90 (4.14 ,14.55)	16.84 (9.82 ,27.34)		25.48 (17.12 ,36.14)	12.20 (7.30 ,19.68)	7.90 (4.14 ,14.55)	16.84 (9.82 ,27.34)
	Smoking,N % (95% CI)					0.7717					0.9545					0.595					0.595
	Yes	63.00 (52.12 ,72.69)	65.02 (55.04 ,73.85)	64.85 (56.33 ,72.52)	58.92 (49.70 ,67.56)		63.13 (53.37 ,71.92)	61.58 (52.48 ,69.93)	65.22 (55.48 ,73.82)	62.25 (52.49 ,71.10)		60.52 (51.21 ,69.12)	60.18 (51.32 ,68.42)	63.83 (54.61 ,72.14)	67.40 (57.94 ,75.63)		60.52 (51.21 ,69.12)	60.18 (51.32 ,68.42)	63.83 (54.61 ,72.14)	67.40 (57.94 ,75.63)
	No	37.00 (27.31 ,47.88)	34.98 (26.15 ,44.96)	35.15 (27.48 ,43.67)	41.08 (32.44 ,50.30)		36.87 (28.08 ,46.63)	38.42 (30.07 ,47.52)	34.78 (26.18 ,44.52)	37.75 (28.90 ,47.51)		39.48 (30.88 ,48.79)	39.82 (31.58 ,48.68)	36.17 (27.86 ,45.39)	32.60 (24.37 ,42.06)		39.48 (30.88 ,48.79)	39.82 (31.58 ,48.68)	36.17 (27.86 ,45.39)	32.60 (24.37 ,42.06)
	Diabetes,N % (95% CI)					<0.001					<0.001					<0.001					<0.001
	Yes	12.21 (7.19 ,19.97)	17.86 (12.27 ,25.28)	27.96 (19.87 ,37.77)	50.65 (41.75 ,59.51)		7.64 (4.24 ,13.37)	20.47 (13.55 ,29.71)	30.24 (22.53 ,39.25)	49.16 (39.82 ,58.57)		7.45 (4.08 ,13.24)	17.20 (11.43 ,25.06)	35.76 (26.58 ,46.12)	49.34 (40.35 ,58.38)		7.45 (4.08 ,13.24)	17.20 (11.43 ,25.06)	35.76 (26.58 ,46.12)	49.34 (40.35 ,58.38)
	No	87.79 (80.03 ,92.81)	82.14 (74.72 ,87.73)	72.04 (62.23 ,80.13)	49.35 (40.49 ,58.25)		92.36 (86.63 ,95.76)	79.53 (70.29 ,86.45)	69.76 (60.75 ,77.47)	50.84 (41.43 ,60.18)		92.55 (86.76 ,95.92)	82.80 (74.94 ,88.57)	64.24 (53.88 ,73.42)	50.66 (41.62 ,59.65)		92.55 (86.76 ,95.92)	82.80 (74.94 ,88.57)	64.24 (53.88 ,73.42)	50.66 (41.62 ,59.65)
	Hypertension,N % (95% CI)					0.0874					0.0464					0.0077					0.0077
	Yes	67.62 (56.63 ,76.96)	63.62 (53.28 ,72.85)	71.79 (62.51 ,79.53)	78.86 (70.71 ,85.21)		64.82 (54.52 ,73.90)	65.13 (55.10 ,73.99)	70.81 (61.24 ,78.83)	80.05 (70.68 ,86.98)		59.22 (49.42 ,68.34)	73.39 (64.47 ,80.74)	70.86 (61.15 ,78.98)	78.62 (69.48 ,85.59)		59.22 (49.42 ,68.34)	73.39 (64.47 ,80.74)	70.86 (61.15 ,78.98)	78.62 (69.48 ,85.59)
	No	32.38 (23.04 ,43.37)	36.38 (27.15 ,46.72)	28.21 (20.47 ,37.49)	21.14 (14.79 ,29.29)		35.18 (26.10 ,45.48)	34.87 (26.01 ,44.90)	29.19 (21.17 ,38.76)	19.95 (13.02 ,29.32)		40.78 (31.66 ,50.58)	26.61 (19.26 ,35.53)	29.14 (21.02 ,38.85)	21.38 (14.41 ,30.52)		40.78 (31.66 ,50.58)	26.61 (19.26 ,35.53)	29.14 (21.02 ,38.85)	21.38 (14.41 ,30.52)
	Asthma,N % (95% CI)					0.9352					0.0087					0.2221					0.2221
	Yes	25.01 (17.72 ,34.04)	23.35 (16.44 ,32.03)	22.23 (15.29 ,31.16)	21.65 (15.22 ,29.84)		21.24 (14.00 ,30.86)	17.40 (11.70 ,25.08)	18.26 (12.55 ,25.81)	33.50 (25.58 ,42.48)		21.56 (14.83 ,30.25)	20.06 (14.27 ,27.45)	20.15 (13.79 ,28.47)	29.70 (21.43 ,39.55)		21.56 (14.83 ,30.25)	20.06 (14.27 ,27.45)	20.15 (13.79 ,28.47)	29.70 (21.43 ,39.55)
	No	74.99 (65.96 ,82.28)	76.65 (67.97 ,83.56)	77.77 (68.84 ,84.71)	78.35 (70.16 ,84.78)		78.76 (69.14 ,86.00)	82.60 (74.92 ,88.30)	81.74 (74.19 ,87.45)	66.50 (57.52 ,74.42)		78.44 (69.75 ,85.17)	79.94 (72.55 ,85.73)	79.85 (71.53 ,86.21)	70.30 (60.45 ,78.57)		78.44 (69.75 ,85.17)	79.94 (72.55 ,85.73)	79.85 (71.53 ,86.21)	70.30 (60.45 ,78.57)
	Coronary heart disease,N % (95% CI)					0.3395					0.7981					0.7543					0.7543
	Yes	18.04 (11.68 ,26.82)	16.94 (11.02 ,25.15)	13.07 (8.15 ,20.30)	22.05 (15.29 ,30.71)		17.26 (11.29 ,25.49)	16.56 (11.34 ,23.55)	20.55 (14.12 ,28.93)	16.04 (10.25 ,24.21)		16.17 (10.33 ,24.42)	20.59 (14.53 ,28.35)	15.46 (9.28 ,24.63)	17.57 (11.57 ,25.77)		16.17 (10.33 ,24.42)	20.59 (14.53 ,28.35)	15.46 (9.28 ,24.63)	17.57 (11.57 ,25.77)
	No	81.96 (73.18 ,88.32)	83.06 (74.85 ,88.98)	86.93 (79.70 ,91.85)	77.95 (69.29 ,84.71)		82.74 (74.51 ,88.71)	83.44 (76.45 ,88.66)	79.45 (71.07 ,85.88)	83.96 (75.79 ,89.75)		83.83 (75.58 ,89.67)	79.41 (71.65 ,85.47)	84.54 (75.37 ,90.72)	82.43 (74.23 ,88.43)		83.83 (75.58 ,89.67)	79.41 (71.65 ,85.47)	84.54 (75.37 ,90.72)	82.43 (74.23 ,88.43)
